# Supplementary material
Source: Springer Nature journal article supplement (https://www.springermedizin.de/resource/supplementary/13054_2005_3531_MOESM2_ESM.pdf/9720692)

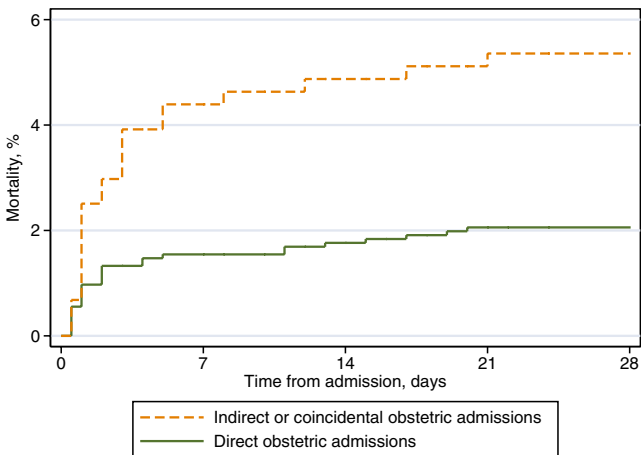

Supplement: MOESM2 [file 9720692]
